# Supplementary material for: Preserving Colour Fidelity in Photogrammetry—An Empirically Grounded Study and Workflow for Cultural Heritage Preservation
Source: MDPI journal article supplement (doi:10.3390/heritage6080300), 2023-08-05
Supplement: s1 [file s1]

| Mixed - Adobe | Discard          | Discard          | Interp.          | Interp.          | Direct           | Direct           |
|---------------|------------------|------------------|------------------|------------------|------------------|------------------|
| Patch         | $\Delta E$ - D50 | $\Delta E$ - D65 | $\Delta E$ - D50 | $\Delta E$ - D65 | $\Delta E$ - D50 | $\Delta E$ - D65 |
| 1             | 3.814005114      | 3.794257761      | 4.187724386      | 4.176926017      | 5.727040262      | 5.507211912      |
| 2             | 10.53389146      | 10.50268932      | 8.748169309      | 8.696559986      | 8.715276411      | 8.672611198      |
| 3             | 11.44914981      | 11.71996235      | 10.7552828       | 11.04626452      | 10.67061621      | 10.79945847      |
| 4             | 4.830586161      | 4.788238065      | 5.385514888      | 5.38481022       | 6.044415112      | 6.099740501      |
| 5             | 14.40869349      | 14.44151896      | 15.19588357      | 15.24404485      | 14.67903218      | 14.72675975      |
| 6             | 15.8853097       | 17.01103872      | 15.99844654      | 16.87501797      | 15.6527097       | 16.44231428      |
| 7             | 26.58637108      | 26.15196498      | 28.60033189      | 28.11005153      | 21.53002376      | 21.27832498      |
| 8             | 9.119366273      | 8.912341914      | 8.910954713      | 8.722670855      | 8.724230668      | 8.564733748      |
| 9             | 12.32532511      | 12.47844957      | 12.51117236      | 12.67521475      | 13.2787904       | 13.47226147      |
| 10            | 6.169070417      | 6.325689692      | 6.520716686      | 6.720606057      | 6.951357328      | 7.222537132      |
| 11            | 22.44424014      | 22.20421149      | 21.54050392      | 21.41090057      | 20.56174239      | 20.46041222      |
| 12            | 12.30258823      | 12.15295405      | 13.29312117      | 13.16057042      | 11.4024277       | 11.3309979       |
| 13            | 9.03874951       | 10.96224272      | 9.151216117      | 10.81700912      | 9.002204647      | 10.71516737      |
| 14            | 11.83667321      | 11.7789875       | 11.05750897      | 11.00555644      | 11.61056633      | 11.56602205      |
| 15            | 9.382518908      | 9.340192011      | 9.114473675      | 9.100905625      | 8.940329499      | 8.899340361      |
| 16            | 18.3776512       | 18.05363901      | 16.70003551      | 16.41473868      | 14.45599727      | 14.28554773      |
| 17            | 11.16549895      | 11.13396499      | 10.85374442      | 10.8290986       | 11.47911812      | 11.44145722      |
| 18            | 15.57790047      | 18.02583155      | 12.73398111      | 13.47901196      | 13.48855882      | 14.45359829      |
| 19            | 20.86290951      | 21.84998063      | 19.96372665      | 21.52490153      | 17.37572608      | 17.76600394      |
| 20            | 18.157986        | 18.47718281      | 17.27732116      | 18.04745074      | 18.5601486       | 19.21754263      |
| 21            | 13.2099996       | 14.74379933      | 12.67324382      | 12.67937762      | 11.50583362      | 11.71065187      |
| 22            | 11.61319147      | 11.48400714      | 11.71055186      | 11.66271914      | 11.20297734      | 11.07213046      |
| 23            | 7.229140876      | 7.390248886      | 7.096061158      | 7.238185976      | 8.058071909      | 8.537541433      |
| 24            | 1.814159318      | 1.766633469      | 1.795013879      | 1.765446172      | 15.08282757      | 15.35871054      |

Table S1: Table showing the average CIEDE2000 differences for each patch of the colour chart between the reference image and the photogrammetry image. The results are calculated for two illuminants: D65 and D50, for the Mixed reconstruction in Adobe RGB space

| Mixed - sRGB | Discard          | Discard          | Interp.          | Interp.          | Direct           | Direct           |
|--------------|------------------|------------------|------------------|------------------|------------------|------------------|
| Patch        | $\Delta E$ - D50 | $\Delta E$ - D65 | $\Delta E$ - D50 | $\Delta E$ - D65 | $\Delta E$ - D50 | $\Delta E$ - D65 |
| 1            | 6.793457167      | 6.149023122      | 7.902182844      | 7.223958216      | 12.06499621      | 10.37704902      |
| 2            | 10.04056843      | 10.05507163      | 9.245134819      | 9.236413525      | 9.093918556      | 9.095763026      |
| 3            | 10.89672039      | 11.12051927      | 10.63878094      | 10.85676891      | 10.58257605      | 10.65112958      |
| 4            | 6.373562577      | 6.340759126      | 7.274586403      | 7.26194416       | 8.430880323      | 8.438657522      |
| 5            | 15.51911167      | 15.61246725      | 15.63925308      | 15.76657708      | 15.60308077      | 15.7177366       |
| 6            | 14.30154968      | 15.78262557      | 15.6298067       | 16.75429394      | 15.77371074      | 16.63233647      |
| 7            | 11.34174513      | 11.33565386      | 11.9789468       | 11.99063828      | 19.31469682      | 19.34629866      |
| 8            | 9.655935482      | 9.421895299      | 9.290559125      | 9.060776813      | 9.372147577      | 9.149571178      |
| 9            | 13.4706023       | 13.37140738      | 13.41664885      | 13.31678425      | 13.14237608      | 12.89483188      |
| 10           | 7.828506532      | 8.021853084      | 7.979776967      | 8.204937434      | 9.481251019      | 9.94103379       |
| 11           | 19.86004325      | 19.95292983      | 19.47365315      | 19.5957993       | 19.33959942      | 19.53342184      |
| 12           | 11.71995365      | 11.73824463      | 13.14036902      | 13.16504125      | 16.69667636      | 16.72163004      |
| 13           | 8.227575307      | 8.664739142      | 8.24506131       | 8.840711597      | 8.512096006      | 9.352759407      |
| 14           | 12.97938065      | 12.97389424      | 13.04621022      | 13.03290096      | 14.02060929      | 14.01250628      |
| 15           | 11.50840441      | 11.23658121      | 11.77249412      | 11.42570769      | 12.41938385      | 12.15960109      |
| 16           | 19.44255246      | 19.47259232      | 22.05493448      | 22.08981295      | 24.88677824      | 24.93588827      |
| 17           | 11.79493035      | 11.66901112      | 12.29646597      | 12.20084805      | 13.06538648      | 12.94071607      |
| 18           | 14.69854973      | 16.57641632      | 14.03777154      | 15.49409638      | 14.7555172       | 16.29595095      |
| 19           | 28.23889039      | 31.90397436      | 27.84602586      | 32.63489053      | 27.55387214      | 31.45795728      |
| 20           | 18.60577259      | 18.933974        | 17.34239303      | 17.81789941      | 17.96158814      | 18.3278614       |
| 21           | 14.98687082      | 15.27061741      | 14.11526638      | 14.2281524       | 15.34127567      | 15.77035018      |
| 22           | 13.17137213      | 13.4793734       | 13.3309918       | 13.55830277      | 13.75012054      | 13.78522001      |
| 23           | 7.48103527       | 7.48219641       | 7.786084717      | 7.732900886      | 11.37225284      | 11.59733989      |
| 24           | 6.905887412      | 6.27145637       | 7.722207032      | 7.140997132      | 10.30165721      | 9.201979218      |

Table S2: Table showing the average CIEDE2000 differences for each patch of the colour chart between the reference image and the photogrammetry image. The results are calculated for two illuminants: D65 and D50, for the Mixed reconstruction in sRGB space

| Mixed - wide | Discard          | Discard          | Interp.          | Interp.          | Direct           | Direct           |
|--------------|------------------|------------------|------------------|------------------|------------------|------------------|
| Patch        | $\Delta E$ - D50 | $\Delta E$ - D65 | $\Delta E$ - D50 | $\Delta E$ - D65 | $\Delta E$ - D50 | $\Delta E$ - D65 |
| 1            | 4.180063359      | 4.158303098      | 4.649974283      | 4.607051146      | 4.477040839      | 4.424884228      |
| 2            | 10.72958947      | 10.71907058      | 8.783751396      | 8.749975236      | 9.192553037      | 9.163475523      |
| 3            | 10.85123342      | 11.07271097      | 11.82912055      | 12.12060056      | 11.53642629      | 11.78230388      |
| 4            | 5.858453228      | 5.7433655        | 6.011850803      | 5.980685814      | 5.959524655      | 5.899030235      |
| 5            | 12.07467847      | 11.81643107      | 12.0151223       | 11.90570917      | 11.84933549      | 11.75447245      |
| 6            | 13.81374085      | 13.62062848      | 15.84619771      | 15.60886657      | 15.25180734      | 14.98861369      |
| 7            | 19.35208378      | 18.56066976      | 19.41908821      | 18.59178034      | 18.01574885      | 17.31141654      |
| 8            | 9.076180388      | 9.010123678      | 8.82623777       | 8.774070943      | 8.626339533      | 8.558714496      |
| 9            | 15.01518444      | 15.40724569      | 14.61749405      | 14.95803644      | 14.58619487      | 14.93405029      |
| 10           | 6.206931144      | 6.345366131      | 6.75674755       | 6.998429592      | 6.799807416      | 7.042626101      |
| 11           | 12.2140032       | 12.1758366       | 11.59738281      | 11.56445172      | 11.90692514      | 11.87820571      |
| 12           | 11.60377198      | 11.45835851      | 12.27811433      | 12.14749818      | 11.26197454      | 11.14582804      |
| 13           | 7.669558765      | 8.471722995      | 7.106813521      | 7.842767868      | 6.831780529      | 7.605348291      |
| 14           | 13.28853972      | 13.28671922      | 12.47869414      | 12.48464306      | 12.35808728      | 12.36349844      |
| 15           | 8.944662235      | 8.942838842      | 9.093407832      | 9.07549998       | 9.092905709      | 9.087440477      |
| 16           | 13.18910688      | 12.99845603      | 13.20818931      | 13.00662127      | 12.54927346      | 12.37777308      |
| 17           | 11.21619711      | 11.19169287      | 11.20370747      | 11.18493008      | 11.0215282       | 11.00085501      |
| 18           | 12.88237406      | 13.15493968      | 12.0620239       | 12.34182584      | 11.79990813      | 12.07866414      |
| 19           | 21.69928021      | 21.95306107      | 20.60777648      | 21.01574654      | 20.41269558      | 20.85232283      |
| 20           | 16.58091898      | 16.08258341      | 16.07406073      | 15.74988931      | 16.1541903       | 15.81873331      |
| 21           | 13.2837924       | 13.33545244      | 12.94398842      | 12.9508784       | 13.14074328      | 13.15702384      |
| 22           | 12.15400901      | 11.84232908      | 11.9950293       | 11.80965721      | 11.75560198      | 11.61737947      |
| 23           | 6.9223448        | 6.856155187      | 7.287063273      | 7.233313309      | 7.198540587      | 7.11923615       |
| 24           | 2.707432428      | 2.908742423      | 3.055203197      | 3.227546878      | 3.024351537      | 3.21968537       |

Table S3: Table showing the average CIEDE2000 differences for each patch of the colour chart between the reference image and the photogrammetry image. The results are calculated for two illuminants: D65 and D50, for the Mixed reconstruction in wide RGB space

| Fluor - Adobe | Discard          | Discard          | Interp.          | Interp.          | Direct           | Direct           |
|---------------|------------------|------------------|------------------|------------------|------------------|------------------|
| Patch         | $\Delta E$ - D50 | $\Delta E$ - D65 | $\Delta E$ - D50 | $\Delta E$ - D65 | $\Delta E$ - D50 | $\Delta E$ - D65 |
| 1             | 4.229915547      | 4.106093097      | 4.797700406      | 4.640758556      | 12.12630627      | 11.7739081       |
| 2             | 4.546632367      | 4.826668557      | 4.33402504       | 4.654188781      | 3.893435344      | 4.248383471      |
| 3             | 6.249010329      | 6.704076827      | 5.483643884      | 5.844846487      | 6.225442504      | 6.626136169      |
| 4             | 5.368703775      | 5.278835369      | 4.402155108      | 4.339209225      | 5.882499264      | 5.952875182      |
| 5             | 4.690828564      | 4.974533497      | 3.621663206      | 4.002978236      | 4.00570124       | 4.257535388      |
| 6             | 8.802268466      | 10.1907933       | 7.669599823      | 9.222386393      | 7.28912672       | 8.580091701      |
| 7             | 5.79733553       | 4.985517215      | 5.747040485      | 4.933350705      | 3.731031014      | 3.498198125      |
| 8             | 6.647033636      | 7.078500144      | 6.870241736      | 7.288770103      | 7.064347943      | 7.445996015      |
| 9             | 0.912690493      | 0.913128826      | 0.540853283      | 0.53931742       | 1.635606389      | 1.64807137       |
| 10            | 2.874888208      | 2.484767912      | 3.449776859      | 3.021398301      | 2.693530796      | 2.369585569      |
| 11            | 1.439302266      | 1.383718925      | 1.574904116      | 1.528281679      | 1.18669147       | 1.160197538      |
| 12            | 1.0311947        | 1.023380536      | 2.148481031      | 2.010513082      | 2.881009971      | 2.656434139      |
| 13            | 2.842773861      | 2.799208156      | 3.1445628        | 3.075410652      | 3.47301893       | 3.413011645      |
| 14            | 4.455437992      | 4.498333329      | 5.243553388      | 5.266600996      | 4.463418455      | 4.438481394      |
| 15            | 2.842144097      | 2.802496403      | 2.379815762      | 2.296068929      | 8.78026732       | 8.623476965      |
| 16            | 1.197356934      | 1.162853843      | 0.774515795      | 0.729659728      | 1.229996239      | 1.112765279      |
| 17            | 3.173207681      | 3.087383925      | 3.49562982       | 3.448931685      | 4.565116129      | 4.515590907      |
| 18            | 5.408241707      | 6.903882172      | 5.786360039      | 6.87377486       | 5.890850629      | 6.822875328      |
| 19            | 7.859018829      | 12.01017789      | 8.587805282      | 13.07207535      | 8.035305244      | 12.14540291      |
| 20            | 1.920404515      | 2.529906841      | 1.83526848       | 2.054401802      | 1.941333759      | 2.357719993      |
| 21            | 8.479807172      | 10.57903672      | 10.82087369      | 13.33492943      | 3.06044885       | 3.641994887      |
| 22            | 4.148077833      | 4.97535689       | 3.475827224      | 4.026233385      | 1.325833698      | 1.4405962        |
| 23            | 2.62344444       | 2.677010917      | 1.947898966      | 1.999873846      | 0.962868493      | 0.992091263      |
| 24            | 3.441087915      | 3.579055879      | 3.031163792      | 3.173919058      | 8.31842429       | 6.951109445      |

Table S4: Table showing the average CIEDE2000 differences for each patch of the colour chart between the reference image and the photogrammetry image. The results are calculated for two illuminants: D65 and D50, for the Fluor reconstruction in Adobe RGB space

| Fluor Set - sRGB | Discard          | Discard          | Interp.          | Interp.          | Direct           | Direct           |
|------------------|------------------|------------------|------------------|------------------|------------------|------------------|
| Patch            | $\Delta E$ - D50 | $\Delta E$ - D65 | $\Delta E$ - D50 | $\Delta E$ - D65 | $\Delta E$ - D50 | $\Delta E$ - D65 |
| 1                | 3.981851481      | 3.745128615      | 4.285998979      | 3.77660121       | 8.958668884      | 8.881147464      |
| 2                | 10.64522498      | 9.582753495      | 13.36005778      | 12.12319308      | 12.07337522      | 11.23166917      |
| 3                | 6.126968685      | 6.289811773      | 5.356054622      | 5.482914857      | 6.207040639      | 6.519741067      |
| 4                | 6.237012868      | 5.949082539      | 5.458178434      | 5.281438896      | 8.903668497      | 8.657225301      |
| 5                | 5.312822839      | 5.604323094      | 4.109193214      | 4.440254628      | 4.128095886      | 4.396458134      |
| 6                | 8.587522271      | 9.700777151      | 7.899488066      | 9.365942096      | 7.136758579      | 8.158751547      |
| 7                | 5.484182109      | 4.746631728      | 2.796418639      | 2.576487261      | 2.440919402      | 2.414744964      |
| 8                | 6.555899243      | 7.058268919      | 6.797180702      | 7.146462393      | 7.175336476      | 7.545870686      |
| 9                | 0.93224958       | 0.956349385      | 0.971271734      | 0.970773296      | 1.805755683      | 1.768483927      |
| 10               | 3.641622514      | 3.199707865      | 3.12164868       | 2.763535987      | 4.404661908      | 4.044681684      |
| 11               | 2.338953798      | 2.137563973      | 3.176608482      | 2.882970686      | 8.898499157      | 8.939104603      |
| 12               | 7.806773738      | 7.399174749      | 9.929386338      | 9.376797546      | 10.57355236      | 10.63280167      |
| 13               | 2.797262069      | 2.709477599      | 2.765159736      | 2.697851366      | 3.236160575      | 3.176350805      |
| 14               | 5.069993845      | 5.070649781      | 4.821768773      | 4.867678026      | 6.367666309      | 6.331843795      |
| 15               | 3.05823528       | 3.075808743      | 2.962993459      | 2.879627662      | 63.96030942      | 59.15177791      |
| 16               | 9.739743393      | 9.766319836      | 10.93293054      | 10.98688109      | 14.11295577      | 14.08832922      |
| 17               | 5.69272178       | 5.674510326      | 5.232945748      | 5.111384308      | 5.277953744      | 5.153611484      |
| 18               | 5.190808494      | 6.237385043      | 4.825533218      | 5.42132528       | 6.208251597      | 7.02694441       |
| 19               | 6.128261777      | 9.582040267      | 6.247170936      | 9.813402781      | 6.180312259      | 9.62711991       |
| 20               | 2.88945229       | 3.30584661       | 1.954351798      | 2.173940662      | 2.574456325      | 3.038193467      |
| 21               | 8.076622508      | 9.984644511      | 10.53172806      | 12.94964903      | 3.021649963      | 3.379256091      |
| 22               | 2.342665336      | 2.991599404      | 1.84833091       | 1.952355679      | 1.492195969      | 1.613880296      |
| 23               | 4.857050408      | 4.75974487       | 6.13128257       | 5.627210554      | 2.834292712      | 2.363583348      |
| 24               | 2.316676289      | 2.326298978      | 2.759446624      | 2.821680746      | 4.121628396      | 4.455150067      |

Table S5: Table showing the average CIEDE2000 differences for each patch of the colour chart between the reference image and the photogrammetry image. The results are calculated for two illuminants: D65 and D50, for the Fluor reconstruction in sRGB space

| Fluor - wide | Discard          | Discard          | Interp.          | Interp.          | Direct           | Direct           |
|--------------|------------------|------------------|------------------|------------------|------------------|------------------|
| Patch        | $\Delta E$ - D50 | $\Delta E$ - D65 | $\Delta E$ - D50 | $\Delta E$ - D65 | $\Delta E$ - D50 | $\Delta E$ - D65 |
| 1            | 4.34755742       | 4.373078281      | 4.422200765      | 4.405256595      | 4.231416675      | 4.219944788      |
| 2            | 10.44500186      | 9.123598402      | 11.45693022      | 9.740093957      | 10.47984295      | 8.788677363      |
| 3            | 5.963077118      | 6.550270239      | 5.468252585      | 5.947486155      | 5.50643906       | 5.914948599      |
| 4            | 5.08726807       | 5.017115209      | 4.287890952      | 4.207894195      | 4.043838991      | 4.001045163      |
| 5            | 4.422147162      | 4.671941984      | 3.930354164      | 4.201143793      | 3.665143731      | 3.910540356      |
| 6            | 8.715542059      | 10.31212506      | 8.474770251      | 10.12956315      | 7.960044179      | 9.488549606      |
| 7            | 7.890662187      | 6.933699068      | 7.45074516       | 6.626443947      | 7.49427118       | 6.4582982        |
| 8            | 5.959562098      | 6.358031699      | 6.262294289      | 6.65934534       | 6.219560285      | 6.67120662       |
| 9            | 3.399051323      | 3.572768588      | 3.469633291      | 3.634947803      | 3.814870115      | 3.871056076      |
| 10           | 2.542482564      | 2.623583023      | 2.139839102      | 1.97571843       | 1.935465466      | 1.843148427      |
| 11           | 1.306515396      | 1.303255205      | 2.49799811       | 2.459785276      | 1.368934023      | 1.367300161      |
| 12           | 2.143693044      | 2.066674066      | 2.469868265      | 2.42780606       | 1.698627701      | 1.679627649      |
| 13           | 3.126648725      | 3.110649083      | 3.73262655       | 3.773339585      | 3.395081554      | 3.406874591      |
| 14           | 4.858038842      | 4.825345855      | 4.350882434      | 4.341052952      | 4.471075356      | 4.490568973      |
| 15           | 2.076656625      | 2.165587592      | 1.160553341      | 1.093518459      | 1.177750411      | 1.164210719      |
| 16           | 1.629744716      | 1.58917028       | 1.163647262      | 1.077488059      | 1.354325309      | 1.262107776      |
| 17           | 3.009612715      | 2.97246228       | 2.567934851      | 2.570151339      | 2.340537648      | 2.382277748      |
| 18           | 5.148149168      | 6.83871101       | 5.958448148      | 7.255678805      | 4.909499703      | 6.2580054        |
| 19           | 9.824366225      | 8.391152038      | 10.17571427      | 8.62222293       | 13.42258815      | 10.0991609       |
| 20           | 2.319913145      | 2.983453914      | 1.677011837      | 2.500528006      | 1.915779466      | 2.745511607      |
| 21           | 7.65531815       | 9.482179252      | 9.255923674      | 11.52211851      | 6.363047013      | 7.977336708      |
| 22           | 3.227588053      | 3.672470852      | 2.093742832      | 2.394670274      | 1.409096134      | 1.67406793       |
| 23           | 2.879977261      | 3.031716275      | 2.635619868      | 2.813197458      | 2.770615573      | 3.145144708      |
| 24           | 2.059363191      | 2.405659139      | 1.495090317      | 1.737006317      | 2.04223949       | 2.31376581       |

Table S6: Table showing the average CIEDE2000 differences for each patch of the colour chart between the reference image and the photogrammetry image. The results are calculated for two illuminants: D65 and D50, for the Fluor reconstruction in wide RGB space

| LED - Adobe | Discard          | Discard          | Interp.          | Interp.          | Direct           | Direct           |
|-------------|------------------|------------------|------------------|------------------|------------------|------------------|
| Patch       | $\Delta E$ - D50 | $\Delta E$ - D65 | $\Delta E$ - D50 | $\Delta E$ - D65 | $\Delta E$ - D50 | $\Delta E$ - D65 |
| 1           | 8.984561204      | 7.287065731      | 7.995981287      | 6.363398167      | 9.050585381      | 7.102904011      |
| 2           | 15.990564        | 14.07652232      | 16.56775964      | 14.92894301      | 13.90118646      | 13.47352335      |
| 3           | 4.426586589      | 4.627473164      | 3.923600107      | 4.321260066      | 4.290961759      | 4.477927585      |
| 4           | 4.560026272      | 3.938195707      | 4.056020555      | 3.366470731      | 5.154456753      | 4.179193096      |
| 5           | 2.284624388      | 2.451554502      | 1.80585719       | 2.368501752      | 1.469702275      | 2.052411349      |
| 6           | 4.50760604       | 5.022157698      | 4.549877647      | 5.137527872      | 4.821259275      | 5.355205697      |
| 7           | 3.516959212      | 3.283738977      | 2.79964467       | 2.589513096      | 3.463317608      | 3.293517411      |
| 8           | 7.552938105      | 8.00308929       | 7.035671201      | 7.387219208      | 7.095070967      | 7.483293892      |
| 9           | 4.990314222      | 4.214938827      | 3.916538716      | 3.338865984      | 3.556317776      | 3.130896178      |
| 10          | 4.475964948      | 4.183162622      | 4.771930266      | 4.405531316      | 5.179182206      | 5.130068643      |
| 11          | 6.414598755      | 6.490043313      | 6.50528672       | 6.63523195       | 6.377088315      | 6.531986731      |
| 12          | 7.953434742      | 7.454547518      | 10.36081808      | 9.741176257      | 10.69523726      | 9.969207989      |
| 13          | 6.267596068      | 6.359311276      | 5.277563663      | 5.397778804      | 5.910318438      | 5.997173409      |
| 14          | 8.278924437      | 8.640412772      | 8.265389135      | 8.593061041      | 7.819774151      | 8.008918896      |
| 15          | 3.937376154      | 3.416932564      | 3.97385942       | 3.437816364      | 6.402589884      | 5.837789849      |
| 16          | 7.9424521        | 7.102010092      | 7.379858044      | 6.644380661      | 6.87690946       | 5.892061814      |
| 17          | 6.648831912      | 5.729224022      | 7.637148593      | 6.774533265      | 7.727915065      | 6.742813134      |
| 18          | 6.870103975      | 7.522226683      | 6.812757316      | 7.270483504      | 7.100508398      | 7.600886993      |
| 19          | 7.965867162      | 12.32575175      | 9.813762046      | 14.64178905      | 10.62261976      | 15.7108121       |
| 20          | 1.651321334      | 1.89540422       | 2.129296287      | 2.573829594      | 2.808131507      | 3.498295509      |
| 21          | 3.646216426      | 3.83406489       | 2.967496031      | 2.946877622      | 4.463486738      | 4.892969935      |
| 22          | 6.102455489      | 6.658398142      | 5.330506088      | 5.571717668      | 6.014527435      | 6.296739242      |
| 23          | 7.954190514      | 7.769662526      | 6.257792833      | 6.084240872      | 7.581928133      | 7.417414538      |
| 24          | 5.282528146      | 5.412029749      | 3.353557771      | 3.498715626      | 6.180104101      | 6.209474244      |

Table S7: Table showing the average CIEDE2000 differences for each patch of the colour chart between the reference image and the photogrammetry image. The results are calculated for two illuminants: D65 and D50, for the LED reconstruction in Adobe RGB space

| LED - sRGB | Discard          | Discard          | Interp.          | Interp.          | Direct           | Direct           |
|------------|------------------|------------------|------------------|------------------|------------------|------------------|
| Patch      | $\Delta E$ - D50 | $\Delta E$ - D65 | $\Delta E$ - D50 | $\Delta E$ - D65 | $\Delta E$ - D50 | $\Delta E$ - D65 |
| 1          | 8.054846974      | 6.806146127      | 6.570926999      | 5.299434169      | 7.20801292       | 6.080253435      |
| 2          | 16.98285394      | 14.95155917      | 16.77829823      | 14.54966193      | 15.29290317      | 13.52972804      |
| 3          | 5.041740838      | 5.161466528      | 3.906836933      | 4.298595222      | 4.885128425      | 5.049987497      |
| 4          | 5.716687564      | 5.602717024      | 4.183311415      | 4.212637149      | 3.930207387      | 3.342050511      |
| 5          | 2.43582307       | 2.541819493      | 1.650819118      | 1.996335395      | 1.841179301      | 2.532860202      |
| 6          | 4.598315709      | 4.955821376      | 4.605334725      | 5.128062259      | 4.469680689      | 4.941096232      |
| 7          | 5.332271792      | 4.945397212      | 5.724437576      | 5.367462565      | 5.301261946      | 4.880886728      |
| 8          | 7.939470359      | 8.310403934      | 6.804344039      | 7.106774701      | 8.867246505      | 9.223119207      |
| 9          | 4.332715932      | 3.804162201      | 6.884428825      | 6.280915882      | 7.779280937      | 7.081114192      |
| 10         | 4.009093773      | 3.612056689      | 4.524802435      | 4.09055493       | 4.612117726      | 4.523992069      |
| 11         | 4.038263798      | 3.818567232      | 4.519121395      | 4.674432825      | 4.695985929      | 4.78458153       |
| 12         | 10.55929409      | 9.660292688      | 13.22444251      | 12.22046329      | 10.01418156      | 9.082509963      |
| 13         | 6.55637098       | 6.560257342      | 4.962070874      | 5.04961431       | 6.951859196      | 7.169590263      |
| 14         | 6.59619744       | 6.845970527      | 6.643615901      | 6.560345229      | 5.720158849      | 5.006687545      |
| 15         | 4.029081615      | 3.366686951      | 5.436834866      | 4.595320182      | 6.683546466      | 5.685182491      |
| 16         | 11.6910592       | 10.81611125      | 11.46660032      | 10.81684079      | 4.70105511       | 3.925766177      |
| 17         | 6.149769109      | 5.230542145      | 7.334585975      | 6.245208067      | 7.093367471      | 6.192270827      |
| 18         | 6.691013326      | 7.40324758       | 7.304782355      | 7.898060485      | 9.088858717      | 9.791444567      |
| 19         | 7.454954785      | 11.626127        | 5.954260086      | 9.522837407      | 6.443165284      | 10.236856        |
| 20         | 2.376825489      | 2.46028973       | 2.412329732      | 2.430161039      | 1.864257914      | 2.182511304      |
| 21         | 4.323654349      | 4.283197895      | 3.257478587      | 3.262007356      | 4.0287255        | 3.987381298      |
| 22         | 5.512085455      | 5.741298563      | 5.568307142      | 5.590790463      | 6.132589258      | 5.949763523      |
| 23         | 8.6872311        | 8.467954101      | 6.317636004      | 6.183104331      | 7.323138563      | 7.366639836      |
| 24         | 3.351609426      | 3.614932926      | 3.265680075      | 3.518783608      | 6.610624318      | 6.73681349       |

Table S8: Table showing the average CIEDE2000 differences for each patch of the colour chart between the reference image and the photogrammetry image. The results are calculated for two illuminants: D65 and D50, for the LED reconstruction in sRGB space

| LED - wide | Discard          | Discard          | Interp.          | Interp.          | Direct           | Direct           |
|------------|------------------|------------------|------------------|------------------|------------------|------------------|
| Patch      | $\Delta E$ - D50 | $\Delta E$ - D65 | $\Delta E$ - D50 | $\Delta E$ - D65 | $\Delta E$ - D50 | $\Delta E$ - D65 |
| 1          | 9.162693632      | 7.558083916      | 7.861413265      | 6.1619553        | 8.591105984      | 6.825378928      |
| 2          | 11.40304364      | 8.858561425      | 10.86721088      | 8.608034314      | 9.96899482       | 7.66000177       |
| 3          | 3.532485958      | 3.82486244       | 3.289073171      | 3.580142538      | 4.084604799      | 4.261952861      |
| 4          | 5.076882413      | 4.285569148      | 3.140284102      | 2.606752045      | 4.007993029      | 3.423792772      |
| 5          | 2.340946775      | 2.505472812      | 1.858963346      | 2.289699312      | 2.193810478      | 2.749923666      |
| 6          | 5.182498891      | 5.743142735      | 4.67096417       | 5.350996195      | 4.669895929      | 5.457076959      |
| 7          | 3.47956843       | 3.254198582      | 3.205563322      | 3.07325295       | 3.401443795      | 3.26288524       |
| 8          | 7.353866566      | 7.694510949      | 6.615133961      | 6.975890458      | 7.802885636      | 8.20506763       |
| 9          | 3.147174179      | 2.880827651      | 3.329616218      | 3.155818724      | 4.061949502      | 3.978547996      |
| 10         | 5.206826365      | 5.125383269      | 5.642236192      | 5.225780728      | 5.961385728      | 5.555738787      |
| 11         | 7.379633389      | 6.945263984      | 7.79947271       | 7.197776029      | 7.409576947      | 6.818058496      |
| 12         | 4.365034312      | 4.006764119      | 4.352728527      | 3.968595489      | 4.019101014      | 3.695097218      |
| 13         | 6.718995729      | 6.79628915       | 5.7581465        | 5.833589697      | 5.81723479       | 5.883301068      |
| 14         | 3.383516168      | 3.258008076      | 4.699312522      | 4.377507347      | 6.390699411      | 6.120520594      |
| 15         | 4.344144141      | 4.061651957      | 3.654383343      | 3.306939925      | 4.329751771      | 4.045866995      |
| 16         | 5.427344758      | 4.747865168      | 7.138408632      | 6.332972319      | 5.750216094      | 5.081447568      |
| 17         | 5.078385503      | 4.688642395      | 5.550954166      | 4.999324625      | 6.089098507      | 5.604623808      |
| 18         | 6.060449083      | 6.509940495      | 7.496450885      | 8.068631239      | 7.566637553      | 8.223801536      |
| 19         | 10.53814717      | 8.807326473      | 10.612027        | 9.595275307      | 12.29523248      | 10.18001021      |
| 20         | 3.9035134        | 5.615135502      | 4.749376169      | 6.994311528      | 6.761188322      | 9.408669669      |
| 21         | 5.188752844      | 5.429388269      | 2.904038893      | 3.042671958      | 3.863238226      | 4.033785548      |
| 22         | 5.472618277      | 6.037540304      | 5.926020891      | 6.523600918      | 6.855455602      | 7.401503175      |
| 23         | 7.34362016       | 7.680563084      | 6.317888661      | 6.646509306      | 7.433731317      | 7.674777827      |
| 24         | 6.284592752      | 6.120166375      | 4.098159756      | 4.037474795      | 4.253393933      | 4.185787235      |

Table S9: Table showing the average CIEDE2000 differences for each patch of the colour chart between the reference image and the photogrammetry image. The results are calculated for two illuminants: D65 and D50, for the LED reconstruction in wide RGB space

| Sun - Adobe | Discard          | Discard          | Interp.          | Interp.          | Direct           | Direct           |
|-------------|------------------|------------------|------------------|------------------|------------------|------------------|
| Patch       | $\Delta E$ - D50 | $\Delta E$ - D65 | $\Delta E$ - D50 | $\Delta E$ - D65 | $\Delta E$ - D50 | $\Delta E$ - D65 |
| 1           | 8.504873533      | 6.87237273       | 8.725404955      | 7.444694424      | 11.97292997      | 10.25324505      |
| 2           | 16.1285488       | 15.26885627      | 14.64447607      | 13.86909827      | 12.9245786       | 12.22959862      |
| 3           | 12.8220323       | 14.01681656      | 11.131206        | 12.74460239      | 9.9557499        | 11.51783173      |
| 4           | 7.037886326      | 5.421276331      | 8.386316827      | 6.498833952      | 8.300946235      | 6.355601852      |
| 5           | 3.69099632       | 4.805891344      | 5.365457572      | 7.269101299      | 32.32646753      | 37.36061468      |
| 6           | 12.12934959      | 13.43595716      | 8.599274447      | 10.20650929      | 24.36798789      | 27.15475228      |
| 7           | 6.066490078      | 5.667328071      | 6.11470347       | 5.902130331      | 5.64690978       | 5.433201483      |
| 8           | 1.582171731      | 1.927213817      | 2.717817962      | 3.035480265      | 2.706431636      | 2.895199152      |
| 9           | 7.094071604      | 6.664060864      | 6.482699869      | 6.350754312      | 5.75502014       | 5.575720422      |
| 10          | 8.777375071      | 10.01641467      | 8.744514161      | 10.23556374      | 10.08236342      | 12.08787124      |
| 11          | 10.28799065      | 9.845260742      | 13.9757209       | 13.02844393      | 14.17181803      | 12.51540397      |
| 12          | 8.061011053      | 7.579972472      | 12.55130095      | 11.61109986      | 9.584101883      | 9.119751341      |
| 13          | 7.565614701      | 8.696448457      | 6.763072955      | 7.733065111      | 6.406970297      | 7.411727387      |
| 14          | 7.397796833      | 7.657653911      | 7.344510548      | 7.600917995      | 6.092618983      | 5.914170243      |
| 15          | 5.838861116      | 5.322257958      | 5.326560599      | 4.874301736      | 4.672806105      | 4.1893853        |
| 16          | 19.46243404      | 17.81028748      | 20.00581195      | 18.92702518      | 20.42740568      | 18.93974035      |
| 17          | 8.87076644       | 8.598753647      | 13.61733102      | 13.51151324      | 13.05616672      | 12.86965527      |
| 18          | 9.53805564       | 10.85674091      | 10.58754507      | 12.01689925      | 9.484087753      | 10.81298284      |
| 19          | 9.341836056      | 10.43602631      | 10.35582417      | 11.48312554      | 10.36735897      | 11.39803497      |
| 20          | 8.793443444      | 9.249809903      | 8.005047243      | 8.451991614      | 7.698770117      | 8.099280835      |
| 21          | 16.39820388      | 20.01775291      | 14.72411343      | 17.92782072      | 12.94847119      | 15.43181534      |
| 22          | 6.317324075      | 6.956964807      | 6.575935314      | 7.434031417      | 6.548423988      | 7.617683409      |
| 23          | 1.883901034      | 1.968142753      | 1.78381816       | 1.862483305      | 3.027157372      | 3.190601972      |
| 24          | 2.627972583      | 2.593253251      | 2.723440645      | 2.687748891      | 5.25748273       | 5.153587755      |

Table S10: Table showing the average CIEDE2000 differences for each patch of the colour chart between the reference image and the photogrammetry image. The results are calculated for two illuminants: D65 and D50, for the Sun reconstruction in Adobe RGB space

| Sun - sRGB | Discard          | Discard          | Interp.          | Interp.          | Direct           | Direct           |
|------------|------------------|------------------|------------------|------------------|------------------|------------------|
| Patch      | $\Delta E$ - D50 | $\Delta E$ - D65 | $\Delta E$ - D50 | $\Delta E$ - D65 | $\Delta E$ - D50 | $\Delta E$ - D65 |
| 1          | 5.708019827      | 5.119998756      | 7.683162125      | 6.841028918      | 4.788000242      | 4.380284251      |
| 2          | 16.850757        | 16.18500907      | 17.26551135      | 16.31232736      | 15.17969841      | 14.42838324      |
| 3          | 10.96852094      | 12.77670963      | 10.93422601      | 12.68426308      | 8.669348531      | 10.40461005      |
| 4          | 4.077055772      | 3.316246073      | 9.246494964      | 7.051061992      | 51.27544012      | 44.33812515      |
| 5          | 4.191159414      | 6.213728319      | 4.657246327      | 6.069879787      | 32.41574237      | 37.4056423       |
| 6          | 9.121984274      | 10.40027368      | 13.34624472      | 14.3923564       | 8.263995159      | 9.497545044      |
| 7          | 7.662452181      | 7.488336716      | 8.26178173       | 8.186847912      | 8.433688711      | 8.319209356      |
| 8          | 1.560630816      | 1.775654273      | 2.515953211      | 2.62957391       | 2.067380077      | 2.264901843      |
| 9          | 8.189127191      | 8.138768167      | 10.62477275      | 10.21432048      | 10.94675942      | 10.76894115      |
| 10         | 7.953257293      | 9.347441573      | 12.9740859       | 16.08232363      | 8.07751339       | 9.37693878       |
| 11         | 10.46387835      | 9.8321107        | 13.99180647      | 12.67588536      | 21.30859197      | 19.49712813      |
| 12         | 17.42790497      | 16.07442261      | 19.8625235       | 18.24407942      | 25.94464544      | 22.99452171      |
| 13         | 6.602520986      | 7.604755694      | 6.258051511      | 7.093261767      | 5.762166535      | 6.570660395      |
| 14         | 7.125677289      | 7.410386636      | 7.164751384      | 7.438332215      | 6.045274608      | 6.205662246      |
| 15         | 7.067672868      | 6.86485669       | 7.637772018      | 7.400122009      | 7.60631742       | 7.208440806      |
| 16         | 14.55750144      | 13.82749259      | 9.836435539      | 9.581759608      | 8.523962968      | 8.272412765      |
| 17         | 12.36998205      | 11.62007325      | 8.072521436      | 7.723172789      | 43.88782628      | 43.87061234      |
| 18         | 8.541892918      | 9.795232972      | 8.124074387      | 9.174298457      | 8.92446937       | 10.24848166      |
| 19         | 9.62985488       | 11.05360177      | 10.32725015      | 11.60863224      | 9.715099561      | 10.98897153      |
| 20         | 7.163305566      | 7.82354479       | 8.464067166      | 9.005582686      | 7.676458669      | 8.14661643       |
| 21         | 16.27366147      | 19.49185123      | 16.13164307      | 19.37487757      | 14.4274303       | 16.84020985      |
| 22         | 5.974244298      | 6.832481334      | 7.356387132      | 8.320520194      | 7.014144654      | 8.091321644      |
| 23         | 4.922214486      | 5.161308895      | 6.188444085      | 6.028689822      | 5.798678981      | 5.558919553      |
| 24         | 2.96142058       | 3.076165749      | 1.994822145      | 2.148371921      | 1.855533725      | 1.695444461      |

Table S11: Table showing the average CIEDE2000 differences for each patch of the colour chart between the reference image and the photogrammetry image. The results are calculated for two illuminants: D65 and D50, for the Sun reconstruction in sRGB space

| Sun Set - wide | Discard          | Discard          | Interp.          | Interp.          | Direct           | Direct           |
|----------------|------------------|------------------|------------------|------------------|------------------|------------------|
| Patch          | $\Delta E$ - D50 | $\Delta E$ - D65 | $\Delta E$ - D50 | $\Delta E$ - D65 | $\Delta E$ - D50 | $\Delta E$ - D65 |
| 1              | 4.542636782      | 3.770912894      | 5.76014948       | 4.799081014      | 5.59983504       | 4.677398392      |
| 2              | 10.07041349      | 8.833407586      | 8.614502501      | 7.864891337      | 8.834710122      | 8.027886028      |
| 3              | 4.328919921      | 5.292940139      | 4.894084463      | 5.819313429      | 4.010912733      | 4.917981913      |
| 4              | 6.39664124       | 5.11750994       | 7.196570018      | 6.178671793      | 7.924103225      | 6.35137248       |
| 5              | 5.359217759      | 6.033692946      | 5.472833554      | 6.727254548      | 6.02848271       | 7.12271146       |
| 6              | 9.325386777      | 11.20363456      | 8.69057512       | 10.52482721      | 9.310254146      | 11.10122445      |
| 7              | 5.445606827      | 5.063798806      | 6.208495867      | 5.954839864      | 6.217076765      | 5.888819537      |
| 8              | 1.852796317      | 2.264715811      | 2.427675795      | 2.810624659      | 2.065374604      | 2.622759311      |
| 9              | 3.620740961      | 3.855773868      | 4.414215919      | 4.553699678      | 4.192953227      | 4.387481885      |
| 10             | 7.126361486      | 8.196828151      | 10.0376093       | 12.38193666      | 8.429620586      | 9.655588647      |
| 11             | 13.56363197      | 12.06012264      | 19.04909337      | 17.47232089      | 16.62329786      | 15.29127381      |
| 12             | 7.195532128      | 6.783843075      | 8.423624865      | 7.925101638      | 11.52829913      | 10.58362691      |
| 13             | 7.590613846      | 8.763304714      | 7.152095568      | 8.357574123      | 7.114820746      | 8.449199713      |
| 14             | 5.942386786      | 5.985445981      | 6.423381528      | 6.401887567      | 6.080436251      | 5.884773789      |
| 15             | 4.852072691      | 4.309121544      | 4.681152924      | 4.345251689      | 4.310353133      | 4.051347934      |
| 16             | 12.09666679      | 11.48238169      | 11.09161695      | 10.45147303      | 12.49399301      | 11.87591744      |
| 17             | 9.510296826      | 9.697011571      | 6.858497585      | 7.111130393      | 12.91888719      | 13.08711162      |
| 18             | 9.368330824      | 10.33270458      | 8.040050031      | 8.889215211      | 10.27190508      | 11.10584882      |
| 19             | 25.31328024      | 21.8798749       | 22.15056003      | 20.19864085      | 24.93478417      | 21.33708923      |
| 20             | 8.381107377      | 8.792223781      | 8.612636734      | 9.026668561      | 8.541365943      | 8.957530509      |
| 21             | 17.75674328      | 21.73485319      | 17.19316672      | 21.18620607      | 16.78311725      | 20.46333076      |
| 22             | 6.420202999      | 7.494836471      | 6.399327185      | 7.407096434      | 6.988108842      | 8.060092923      |
| 23             | 4.476075778      | 4.538441152      | 2.13416736       | 2.280005623      | 2.590812676      | 2.713631886      |
| 24             | 4.091982235      | 4.052731656      | 3.13116016       | 3.203719305      | 8.597781941      | 8.465008546      |

Table S12: Table showing the average CIEDE2000 differences for each patch of the colour chart between the reference image and the photogrammetry image. The results are calculated for two illuminants: D65 and D50, for the Sun reconstruction in wide RGB space

| Mixed - Adobe | Discard  | Discard    | Interp.  | Interp.   | Direct   | Direct     |
|---------------|----------|------------|----------|-----------|----------|------------|
| Patch         | Pearson  | r-value    | Pearson  | r-value   | Pearson  | r-value    |
| 1             | 0.99997  | 0.0048439  | 0.99989  | 0.0092069 | 0.99895  | 0.0291573  |
| 2             | 0.99997  | 0.0040404  | 0.99997  | 0.0046256 | 0.99999  | 0.00087665 |
| 3             | 0.97619  | 0.139156   | 0.97936  | 0.129585  | 0.98287  | 0.117993   |
| 4             | 0.99990  | 0.0087544  | 0.99831  | 0.036926  | 0.99292  | 0.07571    |
| 5             | 0.99767  | 0.043303   | 0.99710  | 0.048459  | 0.99704  | 0.048979   |
| 6             | 0.186577 | 0.88057    | 0.19294  | 0.87635   | 0.228407 | 0.85324    |
| 7             | 0.90593  | 0.27832    | 0.88545  | 0.30761   | 0.94153  | 0.21879    |
| 8             | 0.99868  | 0.032634   | 0.99873  | 0.0320696 | 0.99910  | 0.026882   |
| 9             | 0.99989  | 0.0093755  | 0.99988  | 0.0096301 | 0.99938  | 0.0224854  |
| 10            | 0.99763  | 0.0437346  | 0.99890  | 0.029864  | 0.99738  | 0.046091   |
| 11            | 0.83664  | 0.369053   | 0.80907  | 0.39998   | 0.83850  | 0.366886   |
| 12            | 0.99701  | 0.049284   | 0.99555  | 0.060035  | 0.99521  | 0.0622464  |
| 13            | 0.99999  | 0.00270846 | 0.99938  | 0.0223368 | 0.99921  | 0.0253296  |
| 14            | 0.99525  | 0.062065   | 0.99800  | 0.040155  | 0.99782  | 0.041901   |
| 15            | 0.99864  | 0.033185   | 0.99861  | 0.03341   | 0.99828  | 0.037276   |
| 16            | 0.99978  | 0.0132176  | 0.99918  | 0.0257622 | 0.99974  | 0.0145093  |
| 17            | 0.98807  | 0.09845    | 0.99313  | 0.074618  | 0.98854  | 0.096464   |
| 18            | 0.88363  | 0.310145   | 0.96826  | 0.160884  | 0.95532  | 0.19108    |
| 19            | 0.329394 | 0.78631    | 0.396155 | 0.74063   | -0.99733 | 0.046593   |
| 20            | 0.76343  | 0.447077   | 0.74707  | 0.462963  | 0.71947  | 0.4887     |
| 21            | 0.99805  | 0.0396165  | 0.99825  | 0.037639  | 0.99812  | 0.0390514  |
| 22            | 0.30366  | 0.80359    | 0.97305  | 0.148192  | 0.82721  | 0.37982    |
| 23            | -0.76129 | 0.449173   | -0.76937 | 0.44112   | -0.96979 | 0.157083   |
| 24            | 0.85985  | 0.341176   | 0.70264  | 0.50404   | -0.16573 | 0.89397    |

Table S13: Table showing the average Pearson coefficient values for each patch of the colour chart between the set reference image and the photogrammetry image. The set is the Mixed reconstruction in Adobe RGB space

| Mixed - sRGB | Discard  | Discard  | Interp. | Interp.  | Direct   | Direct   |
|--------------|----------|----------|---------|----------|----------|----------|
| Patch        | Pearson  | r-value  | Pearson | r-value  | Pearson  | r-value  |
| 1            | 0.9999   | 0.024182 | 0.9983  | 0.03607  | 0.9926   | 0.07656  |
| 2            | 0.9993   | 0.023618 | 0.9996  | 0.01559  | 0.9998   | 0.02309  |
| 3            | 0.958    | 0.18347  | 0.9654  | 0.16328  | 0.9701   | 0.15105  |
| 4            | 0.9832   | 0.11007  | 0.9775  | 0.13267  | 0.9787   | 0.1303   |
| 5            | 0.9947   | 0.06829  | 0.9938  | 0.07318  | 0.993    | 0.0744   |
| 6            | 0.3138   | 0.7936   | 0.4667  | 0.6927   | 0.4361   | 0.7115   |
| 7            | 0.9899   | 0.09045  | 0.9861  | 0.10749  | 0.9696   | 0.15836  |
| 8            | 0.9978   | 0.04633  | 0.9976  | 0.04621  | 0.9975   | 0.04392  |
| 9            | 0.9959   | 0.05476  | 0.9964  | 0.054585 | 0.9934   | 0.07495  |
| 10           | 0.9935   | 0.07474  | 0.9863  | 0.10937  | 0.9694   | 0.15007  |
| 11           | 0.8231   | 0.38203  | 0.8086  | 0.4017   | 0.8449   | 0.3664   |
| 12           | 0.9812   | 0.12756  | 0.980   | 0.12313  | 0.9786   | 0.13418  |
| 13           | 0.9994   | 0.027227 | 0.9994  | 0.0297   | 0.9999   | 0.02276  |
| 14           | 0.9995   | 0.000028 | 0.9976  | 0.04386  | 0.9999   | 0.024204 |
| 15           | 0.9995   | 0.017964 | 0.9991  | 0.006328 | 0.9997   | 0.02129  |
| 16           | 0.9956   | 0.06311  | 0.9892  | 0.09174  | 0.9781   | 0.1317   |
| 17           | 0.963    | 0.1703   | 0.9727  | 0.15957  | 0.9636   | 0.1767   |
| 18           | 0.8898   | 0.30265  | 0.9309  | 0.2336   | 0.9259   | 0.24072  |
| 19           | 0.4768   | 0.6841   | 0.42635 | 0.7125   | 0.5172   | 0.6566   |
| 20           | 0.8906   | 0.3075   | 0.8534  | 0.3471   | 0.9061   | 0.27456  |
| 21           | 0.9662   | 0.1681   | 0.9821  | 0.1232   | 0.9736   | 0.14602  |
| 22           | 0.9786   | 0.13744  | 0.953   | 0.1979   | 0.976    | 0.13554  |
| 23           | 0.941    | 0.21095  | 0.9992  | 0.008947 | -0.48124 | 0.6748   |
| 24           | -0.17285 | 0.8827   | -0.4192 | 0.7236   | 0.6844   | 0.5115   |

Table S14: Table showing the average Pearson coefficient values for each patch of the colour chart between the set reference image and the photogrammetry image. The set is the Mixed reconstruction in sRGB space

| Mixed - wide | Discard  | Discard  | Interp. | Interp.  | Direct   | Direct   |
|--------------|----------|----------|---------|----------|----------|----------|
| Patch        | Pearson  | r-value  | Pearson | r-value  | Pearson  | r-value  |
| 1            | 0.9990   | 0.027182 | 0.9980  | 0.03907  | 0.9923   | 0.07856  |
| 2            | 0.9992   | 0.024618 | 0.9996  | 0.01659  | 0.9994   | 0.02009  |
| 3            | 0.9589   | 0.18347  | 0.9656  | 0.16728  | 0.9705   | 0.15405  |
| 4            | 0.9832   | 0.11607  | 0.9771  | 0.13667  | 0.9784   | 0.1323   |
| 5            | 0.9945   | 0.06629  | 0.9937  | 0.07118  | 0.9932   | 0.0744   |
| 6            | 0.3130   | 0.7976   | 0.4668  | 0.6907   | 0.4362   | 0.7125   |
| 7            | 0.9895   | 0.09245  | 0.9868  | 0.10349  | 0.9691   | 0.15836  |
| 8            | 0.9974   | 0.04533  | 0.9972  | 0.04621  | 0.9975   | 0.04492  |
| 9            | 0.9956   | 0.05976  | 0.9964  | 0.053585 | 0.9931   | 0.07495  |
| 10           | 0.9931   | 0.07474  | 0.9869  | 0.10237  | 0.9697   | 0.15707  |
| 11           | 0.8233   | 0.38403  | 0.8085  | 0.4007   | 0.8442   | 0.3604   |
| 12           | 0.9818   | 0.12156  | 0.9806  | 0.12513  | 0.9782   | 0.13318  |
| 13           | 0.9994   | 0.021227 | 0.9991  | 0.0267   | 0.9990   | 0.02876  |
| 14           | 0.9998   | 0.009028 | 0.9978  | 0.04186  | 0.9992   | 0.024204 |
| 15           | 0.9995   | 0.019964 | 0.9999  | 0.002328 | 0.9992   | 0.02529  |
| 16           | 0.9952   | 0.06111  | 0.9899  | 0.09074  | 0.9787   | 0.1317   |
| 17           | 0.9638   | 0.1713   | 0.9723  | 0.15057  | 0.9636   | 0.1727   |
| 18           | 0.8894   | 0.30265  | 0.9302  | 0.2396   | 0.9251   | 0.24772  |
| 19           | 0.4760   | 0.6841   | 0.42695 | 0.7195   | 0.5171   | 0.6536   |
| 20           | 0.8900   | 0.3015   | 0.8535  | 0.3481   | 0.9061   | 0.27856  |
| 21           | 0.9660   | 0.1661   | 0.9822  | 0.1202   | 0.9730   | 0.14802  |
| 22           | 0.9780   | 0.13344  | 0.9539  | 0.1949   | 0.9763   | 0.13854  |
| 23           | 0.9417   | 0.21895  | 0.9999  | 0.008947 | -0.48824 | 0.6748   |
| 24           | -0.17785 | 0.8867   | -0.4172 | 0.7256   | 0.6845   | 0.5195   |

Table S15: Table showing the average Pearson coefficient values for each patch of the colour chart between the set reference image and the photogrammetry image. The set is the Mixed reconstruction in wide RGB space

| Fluor - Adobe | Discard | Discard   | Interp. | Interp.  | Direct  | Direct   |
|---------------|---------|-----------|---------|----------|---------|----------|
| Patch         | Pearson | r-value   | Pearson | r-value  | Pearson | r-value  |
| 1             | 0.9992  | 0.024665  | 0.9991  | 0.02692  | 0.9995  | 0.018    |
| 2             | 0.9980  | 0.039254  | 0.9971  | 0.048226 | 0.9977  | 0.04279  |
| 3             | 0.9929  | 0.07504   | 0.9941  | 0.06814  | 0.9925  | 0.0771   |
| 4             | 0.9908  | 0.08675   | 0.9890  | 0.09432  | 0.9959  | 0.0579   |
| 5             | 0.9998  | 0.009215  | 0.9997  | 0.013833 | 0.9993  | 0.022804 |
| 6             | 0.8787  | 0.316     | 0.8854  | 0.30766  | 0.9012  | 0.28555  |
| 7             | 0.9744  | 0.14437   | 0.9738  | 0.14528  | 0.9852  | 0.10972  |
| 8             | 0.9963  | 0.05457   | 0.9972  | 0.04772  | 0.9971  | 0.04843  |
| 9             | 0.9980  | 0.03991   | 0.9980  | 0.04029  | 0.9969  | 0.0494   |
| 10            | 0.9695  | 0.15714   | 0.9582  | 0.18414  | 0.9703  | 0.1557   |
| 11            | 0.9940  | 0.0697    | 0.9921  | 0.07915  | 0.9952  | 0.06228  |
| 12            | 0.9864  | 0.10453   | 0.9893  | 0.09243  | 0.9894  | 0.09282  |
| 13            | 0.9999  | 0.0003133 | 0.9999  | 0.002147 | 0.9999  | 0.00589  |
| 14            | 0.9967  | 0.05134   | 0.9971  | 0.04829  | 0.9976  | 0.04335  |
| 15            | 0.9972  | 0.04617   | 0.9981  | 0.03934  | 0.9990  | 0.027954 |
| 16            | 0.9978  | 0.041305  | 0.9979  | 0.04155  | 0.9991  | 0.02565  |
| 17            | 0.9789  | 0.1306    | 0.9743  | 0.1445   | 0.9761  | 0.13924  |
| 18            | 0.9701  | 0.15576   | 0.9740  | 0.14544  | 0.9765  | 0.13892  |
| 19            | 0.2346  | 0.849     | 0.24612 | 0.8415   | 0.33177 | 0.7849   |
| 20            | 0.9979  | 0.040645  | 0.9940  | 0.06993  | 0.9883  | 0.09744  |
| 21            | 0.9765  | 0.13803   | 0.9539  | 0.19492  | 0.9996  | 0.01748  |
| 22            | 0.9931  | 0.0749    | 0.9846  | 0.11126  | 0.9993  | 0.02318  |
| 23            | 0.9994  | 0.021034  | 0.9932  | 0.07427  | 0.9981  | 0.03879  |
| 24            | -0.0346 | 0.9783    | 0.39117 | 0.744    | 0.9360  | 0.228    |

Table S16: Table showing the average Pearson coefficient values for each patch of the colour chart between the set reference image and the photogrammetry image. The set is the Fluor reconstruction in Adobe RGB space

| Fluor - sRGB | Discard  | Discard    | Interp.   | Interp.   | Direct   | Direct    |
|--------------|----------|------------|-----------|-----------|----------|-----------|
| Patch        | Pearson  | r-value    | Pearson   | r-value   | Pearson  | r-value   |
| 1            | 0.99640  | 0.054048   | 0.99308   | 0.07494   | 0.97356  | 0.146764  |
| 2            | 0.30819  | 0.80058    | 0.0016852 | 0.9989    | 0.65606  | 0.54448   |
| 3            | 0.99278  | 0.07651    | 0.99499   | 0.06367   | 0.98902  | 0.09442   |
| 4            | 0.94317  | 0.215677   | 0.92292   | 0.251596  | 0.93581  | 0.22938   |
| 5            | 0.99956  | 0.0187693  | 0.99911   | 0.0267096 | 0.99825  | 0.037604  |
| 6            | 0.96302  | 0.173624   | 0.94410   | 0.21384   | 0.97121  | 0.15319   |
| 7            | 0.98453  | 0.112083   | 0.98288   | 0.11791   | 0.98301  | 0.117429  |
| 8            | 0.99307  | 0.074929   | 0.99503   | 0.063475  | 0.99538  | 0.061119  |
| 9            | 0.99841  | 0.035822   | 0.99804   | 0.039826  | 0.99769  | 0.043222  |
| 10           | 0.93969  | 0.222258   | 0.94872   | 0.20476   | 0.97606  | 0.139506  |
| 11           | 0.99975  | 0.0140526  | 0.99958   | 0.0182632 | 0.94529  | 0.211564  |
| 12           | 0.99106  | 0.08512    | 0.98179   | 0.121644  | 0.99978  | 0.0133435 |
| 13           | 0.99998  | 0.00375854 | 0.99996   | 0.0056998 | 0.99968  | 0.016138  |
| 14           | 0.99420  | 0.068513   | 0.98886   | 0.095181  | 0.97748  | 0.135363  |
| 15           | 0.99744  | 0.045464   | 0.99823   | 0.037816  | -0.81789 | 0.390373  |
| 16           | 0.97276  | 0.14899    | 0.97548   | 0.141208  | 0.89699  | 0.29147   |
| 17           | 0.95958  | 0.181657   | 0.96523   | 0.168385  | 0.97077  | 0.15429   |
| 18           | 0.96219  | 0.175622   | 0.96992   | 0.156563  | 0.96117  | 0.17791   |
| 19           | 0.061543 | 0.96078    | 0.116906  | 0.92548   | 0.16548  | 0.89417   |
| 20           | 0.98872  | 0.095665   | 0.98613   | 0.106109  | 0.97647  | 0.138358  |
| 21           | 0.99515  | 0.062748   | 0.97986   | 0.127984  | 0.99857  | 0.033955  |
| 22           | 0.99664  | 0.05212    | 0.99699   | 0.0493425 | 0.99955  | 0.0190178 |
| 23           | 0.38769  | 0.74657    | 0.402814  | 0.73605   | 0.99355  | 0.072362  |
| 24           | 0.81834  | 0.38977    | 0.52595   | 0.64744   | -0.9660  | 0.166464  |

Table S17: Table showing the average Pearson coefficient values for each patch of the colour chart between the set reference image and the photogrammetry image. The set is the Fluor reconstruction in sRGB space

| Fluor - wide | Discard | Discard   | Interp. | Interp.   | Direct   | Direct    |
|--------------|---------|-----------|---------|-----------|----------|-----------|
| Patch        | Pearson | r-value   | Pearson | r-value   | Pearson  | r-value   |
| 1            | 0.9999  | 0.008375  | 0.9995  | 0.01827   | 0.9996   | 0.01768   |
| 2            | 0.8848  | 0.30824   | 0.8562  | 0.34553   | 0.8887   | 0.3038    |
| 3            | 0.9960  | 0.05678   | 0.9958  | 0.0571    | 0.9963   | 0.0546    |
| 4            | 0.9882  | 0.09727   | 0.9901  | 0.08962   | 0.9983   | 0.036705  |
| 5            | 0.9996  | 0.017966  | 0.9993  | 0.023332  | 0.9993   | 0.023312  |
| 6            | 0.9825  | 0.11993   | 0.9753  | 0.1419    | 0.9796   | 0.12852   |
| 7            | 0.9693  | 0.15725   | 0.9701  | 0.15572   | 0.9717   | 0.1513    |
| 8            | 0.9960  | 0.05666   | 0.9963  | 0.05457   | 0.9964   | 0.053136  |
| 9            | 0.9997  | 0.013474  | 0.9998  | 0.010792  | 0.9996   | 0.01672   |
| 10           | 0.9999  | 0.006069  | 0.9986  | 0.03362   | 0.9989   | 0.029376  |
| 11           | 0.9949  | 0.063     | 0.9896  | 0.09148   | 0.9941   | 0.0686    |
| 12           | 0.9944  | 0.06712   | 0.9956  | 0.059144  | 0.9947   | 0.06548   |
| 13           | 0.9964  | 0.05388   | 0.9964  | 0.0538    | 0.9964   | 0.05301   |
| 14           | 0.9889  | 0.09483   | 0.9864  | 0.10534   | 0.9912   | 0.08435   |
| 15           | 0.9996  | 0.017642  | 0.9999  | 0.005635  | 0.9999   | 0.0000378 |
| 16           | 0.9976  | 0.04309   | 0.9986  | 0.032593  | 0.9987   | 0.03123   |
| 17           | 0.9988  | 0.031375  | 0.9990  | 0.027334  | 0.9993   | 0.02271   |
| 18           | 0.9865  | 0.10454   | 0.9859  | 0.10645   | 0.9885   | 0.09628   |
| 19           | 0.1351  | 0.9134    | 0.08382 | 0.9462    | -0.19102 | 0.8772    |
| 20           | 0.9999  | 0.0014367 | 0.9999  | 0.004828  | 0.9999   | 0.005509  |
| 21           | 0.9989  | 0.02914   | 0.9971  | 0.048095  | 0.9997   | 0.01406   |
| 22           | 0.9998  | 0.010509  | 0.9999  | 0.0013936 | 0.9999   | 0.0007152 |
| 23           | 0.9998  | 0.01093   | 0.9990  | 0.027712  | 0.9988   | 0.030784  |
| 24           | 0.9997  | 0.01475   | 0.9991  | 0.026385  | 0.9995   | 0.019955  |

Table S18: Table showing the average Pearson coefficient values for each patch of the colour chart between the set reference image and the photogrammetry image. The set is the Fluor reconstruction in wide RGB space

| LED - Adobe | Discard | Discard   | Interp. | Interp.   | Direct   | Direct    |
|-------------|---------|-----------|---------|-----------|----------|-----------|
| Patch       | Pearson | r-value   | Pearson | r-value   | Pearson  | r-value   |
| 1           | 0.9889  | 0.0943    | 0.9880  | 0.09863   | 0.9851   | 0.10993   |
| 2           | -0.4967 | 0.6694    | -0.5402 | 0.6366    | -0.28955 | 0.8125    |
| 3           | 0.9999  | 0.0066785 | 0.9998  | 0.009318  | 0.9998   | 0.009234  |
| 4           | 0.9937  | 0.07191   | 0.9899  | 0.0905    | 0.9917   | 0.08164   |
| 5           | 0.9974  | 0.04556   | 0.9976  | 0.04357   | 0.9988   | 0.031896  |
| 6           | 0.9990  | 0.02832   | 0.9974  | 0.045305  | 0.9990   | 0.028717  |
| 7           | 0.9884  | 0.09656   | 0.9883  | 0.09772   | 0.9886   | 0.09594   |
| 8           | 0.9988  | 0.030463  | 0.9988  | 0.030012  | 0.9990   | 0.027568  |
| 9           | 0.9999  | 0.002193  | 0.9999  | 0.0012679 | 0.9999   | 0.0013194 |
| 10          | 0.9708  | 0.15478   | 0.9595  | 0.18147   | 0.9828   | 0.1176    |
| 11          | 0.9825  | 0.11989   | 0.9824  | 0.11983   | 0.9842   | 0.11311   |
| 12          | 0.9990  | 0.028988  | 0.9999  | 0.0009582 | 0.9998   | 0.011951  |
| 13          | 0.9999  | 0.0013734 | 0.9999  | 0.0046975 | 0.9999   | 0.0068155 |
| 14          | 0.9690  | 0.15815   | 0.9689  | 0.15972   | 0.9855   | 0.1088    |
| 15          | 0.9974  | 0.04504   | 0.9978  | 0.04153   | 0.9977   | 0.04255   |
| 16          | 0.9997  | 0.013763  | 0.9996  | 0.016585  | 0.9994   | 0.021525  |
| 17          | 0.9400  | 0.22147   | 0.9258  | 0.2469    | 0.9141   | 0.265     |
| 18          | 0.9807  | 0.12582   | 0.9862  | 0.1058    | 0.9864   | 0.10481   |
| 19          | 0.35125 | 0.7714    | 0.24295 | 0.8435    | 0.21387  | 0.8621    |
| 20          | 0.9827  | 0.11846   | 0.9696  | 0.15726   | 0.9445   | 0.2133    |
| 21          | 0.9962  | 0.05505   | 0.9998  | 0.012072  | 0.9860   | 0.10695   |
| 22          | 0.06749 | 0.9577    | 0.1506  | 0.9037    | 0.3533   | 0.7701    |
| 23          | 0.6716  | 0.531     | 0.8350  | 0.37045   | 0.8197   | 0.3886    |
| 24          | 0.7707  | 0.4394    | 0.8167  | 0.3916    | 0.30676  | 0.8011    |

Table S19: Table showing the average Pearson coefficient values for each patch of the colour chart between the set reference image and the photogrammetry image. The set is the LED reconstruction in Adobe RGB space

| LED - sRGB | Discard  | Discard   | Interp. | Interp.  | Direct  | Direct   |
|------------|----------|-----------|---------|----------|---------|----------|
| Patch      | Pearson  | r-value   | Pearson | r-value  | Pearson | r-value  |
| 1          | 0.9868   | 0.10326   | 0.9906  | 0.08784  | 0.9963  | 0.054555 |
| 2          | -0.5709  | 0.6133    | -0.4951 | 0.6709   | -0.5019 | 0.6655   |
| 3          | 0.9999   | 0.007716  | 0.9998  | 0.012535 | 0.9990  | 0.027015 |
| 4          | 0.9926   | 0.07681   | 0.9876  | 0.10063  | 0.9995  | 0.019185 |
| 5          | 0.9978   | 0.0426    | 0.9974  | 0.04536  | 0.9991  | 0.026216 |
| 6          | 0.9999   | 0.0031093 | 0.9986  | 0.03369  | 0.9994  | 0.02021  |
| 7          | 0.9903   | 0.08837   | 0.9911  | 0.08409  | 0.9901  | 0.08964  |
| 8          | 0.9980   | 0.03972   | 0.9978  | 0.041176 | 0.9978  | 0.041465 |
| 9          | 0.9999   | 0.00462   | 0.9995  | 0.019182 | 0.9984  | 0.03556  |
| 10         | 0.9577   | 0.18595   | 0.9417  | 0.21827  | 0.9807  | 0.1256   |
| 11         | 0.9969   | 0.04952   | 0.9904  | 0.08727  | 0.9901  | 0.08955  |
| 12         | 0.9891   | 0.0936    | 0.9797  | 0.1283   | 0.9967  | 0.05179  |
| 13         | 0.9999   | 0.008425  | 0.9997  | 0.013317 | 0.9997  | 0.013223 |
| 14         | 0.9754   | 0.14165   | 0.9926  | 0.07793  | 0.9962  | 0.05561  |
| 15         | 0.9984   | 0.03528   | 0.9992  | 0.025496 | 0.9995  | 0.019766 |
| 16         | 0.9688   | 0.1596    | 0.9733  | 0.14795  | 0.9935  | 0.07278  |
| 17         | 0.9192   | 0.25757   | 0.8990  | 0.2887   | 0.9172  | 0.26096  |
| 18         | 0.9605   | 0.17992   | 0.9681  | 0.16175  | 0.9637  | 0.17136  |
| 19         | 0.11913  | 0.9235    | 0.2505  | 0.8385   | 0.2005  | 0.8718   |
| 20         | 0.9803   | 0.12615   | 0.9914  | 0.08344  | 0.9818  | 0.12127  |
| 21         | 0.9995   | 0.018294  | 0.9987  | 0.03205  | 0.9997  | 0.015379 |
| 22         | -0.19502 | 0.8745    | -0.1896 | 0.8782   | -0.1823 | 0.8823   |
| 23         | 0.5962   | 0.5933    | 0.9117  | 0.2691   | 0.9194  | 0.25784  |
| 24         | 0.9363   | 0.2286    | 0.9079  | 0.2758   | 0.9515  | 0.19806  |

Table S20: Table showing the average Pearson coefficient values for each patch of the colour chart between the set reference image and the photogrammetry image. The set is the LED reconstruction in sRGB space

| LED - wide | Discard   | Discard    | Interp.  | Interp.     | Direct    | Direct    |
|------------|-----------|------------|----------|-------------|-----------|-----------|
| Patch      | Pearson   | r-value    | Pearson  | r-value     | Pearson   | r-value   |
| 1          | 0.32153   | 0.79169    | 0.42262  | 0.7222      | 0.26574   | 0.8287    |
| 2          | -0.102095 | 0.93497    | -0.05243 | 0.96666     | 0.015741  | 0.98993   |
| 3          | 0.99927   | 0.0243034  | 0.99921  | 0.0251703   | 0.99897   | 0.0287016 |
| 4          | 0.87680   | 0.319303   | 0.95000  | 0.202157    | 0.92438   | 0.249196  |
| 5          | 0.99999   | 0.0025596  | 0.99999  | 0.00242783  | 0.99997   | 0.0044497 |
| 6          | 0.99027   | 0.088883   | 0.99289  | 0.075923    | 0.99391   | 0.070207  |
| 7          | 0.99351   | 0.072504   | 0.99327  | 0.073853    | 0.99329   | 0.073789  |
| 8          | 0.99753   | 0.0447475  | 0.99738  | 0.046042    | 0.99742   | 0.045649  |
| 9          | 0.99986   | 0.0104696  | 0.99999  | 0.000105142 | 0.99980   | 0.0124937 |
| 10         | 0.99299   | 0.07538    | 0.98881  | 0.095383    | 0.98883   | 0.095234  |
| 11         | 0.95156   | 0.198992   | 0.94742  | 0.207393    | 0.94987   | 0.202448  |
| 12         | 0.99755   | 0.0445025  | 0.99733  | 0.0464594   | 0.99720   | 0.0476365 |
| 13         | 0.99782   | 0.0419676  | 0.99753  | 0.044711    | 0.99729   | 0.0468435 |
| 14         | 0.99896   | 0.0289606  | 0.99353  | 0.072468    | 0.99427   | 0.068105  |
| 15         | 0.99996   | 0.00513685 | 0.99981  | 0.0123386   | 0.99992   | 0.00789   |
| 16         | 0.99975   | 0.014277   | 0.99888  | 0.0300295   | 0.99950   | 0.02005   |
| 17         | 0.96104   | 0.178266   | 0.94642  | 0.209334    | 0.94738   | 0.207476  |
| 18         | 0.98829   | 0.097566   | 0.99006  | 0.089878    | 0.98976   | 0.091151  |
| 19         | 0.259344  | 0.83295    | 0.25165  | 0.83806     | 0.0179664 | 0.98853   |
| 20         | 0.99856   | 0.034054   | 0.99670  | 0.05163     | 0.99013   | 0.089405  |
| 21         | 0.99998   | 0.0032293  | 0.99993  | 0.0071616   | 0.99991   | 0.0082121 |
| 22         | 0.99959   | 0.0180712  | 0.99852  | 0.0346244   | 0.99805   | 0.039746  |
| 23         | 0.99619   | 0.055542   | 0.99659  | 0.0525385   | 0.99713   | 0.0482046 |
| 24         | 0.99673   | 0.051439   | 0.99804  | 0.039871    | 0.99834   | 0.036575  |

Table S21: Table showing the average Pearson coefficient values for each patch of the colour chart between the set reference image and the photogrammetry image. The set is the LED reconstruction in wide RGB space

| Sun - Adobe | Discard | Discard  | Interp.  | Interp.  | Direct  | Direct   |
|-------------|---------|----------|----------|----------|---------|----------|
| Patch       | Pearson | r-value  | Pearson  | r-value  | Pearson | r-value  |
| 1           | 0.9668  | 0.16473  | 0.9470   | 0.2087   | 0.9534  | 0.19512  |
| 2           | -0.2845 | 0.8163   | -0.09193 | 0.9415   | 0.05946 | 0.9621   |
| 3           | 0.7160  | 0.4917   | 0.8552   | 0.34624  | 0.8976  | 0.2906   |
| 4           | 0.9873  | 0.10197  | 0.9838   | 0.11448  | 0.9780  | 0.13305  |
| 5           | 0.9996  | 0.01636  | 0.9999   | 0.007572 | 0.7338  | 0.4754   |
| 6           | 0.8091  | 0.39903  | 0.8703   | 0.32767  | 0.8393  | 0.36564  |
| 7           | 0.9884  | 0.09668  | 0.9888   | 0.09513  | 0.9902  | 0.0881   |
| 8           | 0.9994  | 0.021218 | 0.9989   | 0.029803 | 0.9986  | 0.032246 |
| 9           | 0.9999  | 0.006681 | 0.9998   | 0.009106 | 0.9999  | 0.000881 |
| 10          | 0.9620  | 0.17526  | 0.9650   | 0.1684   | 0.9644  | 0.1702   |
| 11          | 0.9876  | 0.09939  | 0.9881   | 0.09844  | 0.9993  | 0.02385  |
| 12          | 0.9933  | 0.07326  | 0.9942   | 0.06894  | 0.9937  | 0.07199  |
| 13          | 0.9905  | 0.08771  | 0.9919   | 0.08062  | 0.9937  | 0.07162  |
| 14          | 0.9583  | 0.18464  | 0.9616   | 0.1761   | 0.9965  | 0.05247  |
| 15          | 0.9992  | 0.024814 | 0.9990   | 0.028334 | 0.9992  | 0.02442  |
| 16          | 0.9866  | 0.10488  | 0.9918   | 0.08157  | 0.9864  | 0.10535  |
| 17          | 0.9938  | 0.07044  | 0.9930   | 0.07504  | 0.9918  | 0.08194  |
| 18          | 0.9838  | 0.11405  | 0.9922   | 0.07973  | 0.9920  | 0.08013  |
| 19          | 0.8202  | 0.3879   | 0.7902   | 0.41903  | 0.8115  | 0.3972   |
| 20          | 0.9133  | 0.26767  | 0.9172   | 0.2604   | 0.9263  | 0.24534  |
| 21          | 0.8278  | 0.3795   | 0.8179   | 0.39015  | 0.9001  | 0.28656  |
| 22          | 0.8038  | 0.40523  | 0.7884   | 0.4218   | 0.7287  | 0.48003  |
| 23          | 0.9186  | 0.25875  | 0.9256   | 0.24746  | 0.8697  | 0.32825  |
| 24          | 0.9978  | 0.041874 | 0.9896   | 0.09132  | 0.3878  | 0.7466   |

Table S22: Table showing the average Pearson coefficient values for each patch of the colour chart between the set reference image and the photogrammetry image. The set is the Sun reconstruction in Adobe RGB space

| Sun - sRGB | Discard  | Discard  | Interp. | Interp.   | Direct  | Direct   |
|------------|----------|----------|---------|-----------|---------|----------|
| Patch      | Pearson  | r-value  | Pearson | r-value   | Pearson | r-value  |
| 1          | 0.9987   | 0.03157  | 0.9856  | 0.10738   | 0.9998  | 0.012547 |
| 2          | -0.36115 | 0.764    | -0.3926 | 0.7438    | -0.340  | 0.7791   |
| 3          | 0.7759   | 0.43466  | 0.7774  | 0.43364   | 0.9155  | 0.26337  |
| 4          | 0.9997   | 0.014986 | 0.9891  | 0.09431   | -0.5847 | 0.6025   |
| 5          | 0.9999   | 0.006916 | 0.9999  | 0.0023716 | 0.6515  | 0.5487   |
| 6          | 0.9474   | 0.2078   | 0.9281  | 0.24278   | 0.9626  | 0.17477  |
| 7          | 0.9873   | 0.10185  | 0.9878  | 0.09934   | 0.9897  | 0.09171  |
| 8          | 0.9987   | 0.03245  | 0.9977  | 0.04206   | 0.9975  | 0.044416 |
| 9          | 0.9998   | 0.011083 | 0.9996  | 0.016944  | 0.9967  | 0.05131  |
| 10         | 0.9829   | 0.11707  | 0.9153  | 0.2636    | 0.9960  | 0.056036 |
| 11         | 0.9998   | 0.011047 | 0.9995  | 0.018458  | 0.9684  | 0.16093  |
| 12         | 0.9539   | 0.1934   | 0.9331  | 0.23408   | 0.6586  | 0.5421   |
| 13         | 0.9893   | 0.09289  | 0.9860  | 0.10672   | 0.9889  | 0.09488  |
| 14         | 0.8999   | 0.2872   | 0.9047  | 0.2807    | 0.9605  | 0.17978  |
| 15         | 0.9991   | 0.025948 | 0.9992  | 0.02403   | 0.9998  | 0.012316 |
| 16         | 0.9983   | 0.03694  | 0.9996  | 0.01681   | 0.9919  | 0.0807   |
| 17         | 0.9426   | 0.21603  | 0.9831  | 0.11707   | -0.6694 | 0.5322   |
| 18         | 0.9859   | 0.1061   | 0.9816  | 0.1221    | 0.9870  | 0.10274  |
| 19         | 0.6014   | 0.5892   | 0.5875  | 0.6004    | 0.6303  | 0.565    |
| 20         | 0.8573   | 0.3447   | 0.8433  | 0.3615    | 0.8752  | 0.3218   |
| 21         | 0.8696   | 0.32846  | 0.8514  | 0.3517    | 0.9433  | 0.21502  |
| 22         | 0.7182   | 0.48955  | 0.6716  | 0.5318    | 0.5889  | 0.5995   |
| 23         | 0.6410   | 0.5565   | 0.5469  | 0.6311    | 0.39643 | 0.7401   |
| 24         | 0.9931   | 0.07498  | 0.9797  | 0.1287    | 0.9930  | 0.07551  |

Table S23: Table showing the average Pearson coefficient values for each patch of the colour chart between the set reference image and the photogrammetry image. The set is the Sun reconstruction in sRGB space

| Sun - wide | Discard | Discard   | Interp. | Interp.  | Direct  | Direct   |
|------------|---------|-----------|---------|----------|---------|----------|
| Patch      | Pearson | r-value   | Pearson | r-value  | Pearson | r-value  |
| 1          | 0.9780  | 0.13305   | 0.9193  | 0.25745  | 0.9238  | 0.25027  |
| 2          | 0.16114 | 0.8969    | 0.6365  | 0.560    | 0.5773  | 0.6081   |
| 3          | 0.9967  | 0.05198   | 0.9967  | 0.051447 | 0.9972  | 0.04732  |
| 4          | 0.7382  | 0.4716    | 0.7458  | 0.46454  | 0.5422  | 0.6352   |
| 5          | 0.9995  | 0.019807  | 0.9992  | 0.024858 | 0.9991  | 0.02629  |
| 6          | 0.9999  | 0.0034885 | 0.9994  | 0.021042 | 0.9991  | 0.026736 |
| 7          | 0.9933  | 0.07367   | 0.9936  | 0.07116  | 0.9935  | 0.07243  |
| 8          | 0.9979  | 0.04053   | 0.9974  | 0.04561  | 0.9975  | 0.04488  |
| 9          | 0.9913  | 0.08366   | 0.9963  | 0.05455  | 0.9942  | 0.06867  |
| 10         | 0.9878  | 0.09983   | 0.9768  | 0.13717  | 0.9842  | 0.11365  |
| 11         | 0.9307  | 0.23846   | 0.8811  | 0.31325  | 0.9130  | 0.2675   |
| 12         | 0.9971  | 0.04746   | 0.9965  | 0.05272  | 0.9963  | 0.054845 |
| 13         | 0.9929  | 0.07504   | 0.9930  | 0.07517  | 0.9938  | 0.07096  |
| 14         | 0.9936  | 0.07182   | 0.9961  | 0.05521  | 0.9999  | 0.003274 |
| 15         | 0.9990  | 0.02865   | 0.9997  | 0.015582 | 0.9998  | 0.011989 |
| 16         | 0.9997  | 0.015365  | 0.9995  | 0.018834 | 0.9997  | 0.013734 |
| 17         | 0.9601  | 0.18014   | 0.9859  | 0.1062   | 0.9747  | 0.14355  |
| 18         | 0.9884  | 0.09662   | 0.9866  | 0.10421  | 0.9883  | 0.09751  |
| 19         | -0.612  | 0.5801    | -0.3369 | 0.7819   | -0.6029 | 0.5888   |
| 20         | 0.9995  | 0.018222  | 0.9995  | 0.019168 | 0.9994  | 0.020435 |
| 21         | 0.9825  | 0.11858   | 0.9825  | 0.11903  | 0.9845  | 0.11136  |
| 22         | 0.9956  | 0.05964   | 0.9967  | 0.0511   | 0.9960  | 0.056034 |
| 23         | 0.9985  | 0.03396   | 0.9990  | 0.028685 | 0.9993  | 0.023743 |
| 24         | 0.9988  | 0.03005   | 0.9997  | 0.01227  | 0.9973  | 0.046114 |

Table S24: Table showing the average Pearson coefficient values for each patch of the colour chart between the set reference image and the photogrammetry image. The set is the Sun reconstruction in wide RGB space
